# Supplementary material for: Neoadjuvant Chemoradiotherapy Changes the Landscape of Soluble Immune Checkpoint Molecules in Patients With Locally Advanced Rectal Cancer
Source: Front Oncol. 2022 Apr 21;12:756811. doi: 10.3389/fonc.2022.756811 (PMC9070897; doi:10.3389/fonc.2022.756811)
Supplement: Supplementary file 2 [file Table_1.xlsx]

## Sheet: Sheet2
				Table 1 Relationship of the 8 soluble immune checkpoint molecules to patient clinicopathologic features
				Variables	sPD-L1			sCD80			sCD86			sCD28			sGITR			sGITRL			sCD27			sICOS
					Low	High	p	Low	High	p	Low	High	p	Low	High	p	Low	High	p	Low	High	p	Low	High	p	Low	High	p
				Sex			0.45			0.45			1			1			1			0.45			1			1
				Male	8(53.3)	11(73.3)		8(53.3)	11(73.3)		9(60.0)	10(66.7)		10(66.7)	9(60.0)		9(60.0)	10(66.7)		8(53.3)	11(73.3)		10(66.7)	9(60.0)		9(60.0)	10(66.7)
				Female	7(46.7)	4(26.7)		7(46.7)	4(26.7)		6(40.0)	5(33.3)		5(33.3)	6(40.0)		6(40.0)	5(33.3)		7(46.7)	4(26.7)		5(33.3)	6(40.0)		6(40.0)	5(33.3)
				Age			1			1			1			1			1			1			0.143			1
				≤55.5	8(53.3)	7(46.7)		8(53.3)	7(46.7)		7(46.7)	8(53.3)		7(46.7)	8(53.3)		8(53.3)	7(46.7)		8(53.3)	7(46.7)		10(66.7)	5(33.3)		7(46.7)	8(53.3)
				>55.5	7(46.7)	8(53.3)		7(46.7)	8(53.3)		8(53.3)	7(46.7)		8(53.3)	7(46.7)		7(46.7)	8(53.3)		7(46.7)	8(53.3)		5(33.3)	10(66.7)		8(53.3)	7(46.7)
				Smoking status			1			1			0.7			1			0.7			1			1			0.7
				Yes	5(33.3)	5(33.3)		5(33.3)	5(33.3)		6(40.0）	4(26.7)		5(33.3)	5(33.3)		6(40.0）	4(26.7)		5(33.3)	5(33.3)		5(33.3)	5(33.3)		6(40.0）	4(26.7)
				No	10(66.7)	10(66.7)		10(66.7)	10(66.7)		9(60.0）	11(73.3)		10(66.7)	10(66.7)		9(60.0）	11(73.3)		10(66.7)	10(66.7)		10(66.7)	10(66.7)		9(60.0）	11(73.3)
				Heavy alcohol use			0.682			0.682			1			0.682			1			0.682			0.682			1
				Yes	3(20.0)	5(33.3)		3(20.0)	5(33.3)		4(26.7)	4(26.7)		3(20.0)	5(33.3)		4(26.7)	4(26.7)		3(20.0)	5(33.3)		5(33.3)	3(20.0)		4(26.7)	4(26.7)
				No	12(80.0)	10(66.7)		12(80.0)	10(66.7)		11(73.3)	11(73.3)		12(80.0)	10(66.7)		11(73.3)	11(73.3)		12(80.0)	10(66.7)		10(66.7)	12(80.0)		11(73.3)	11(73.3)
				BMI			0.466			0.466			1			1			1			0.466			1			1
				≤23.7	9(60.0)	6(40.0）		9(60.0)	6(40.0）		7(46.7)	8(53.3)		8(53.3)	7(46.7)		8(53.3)	7(46.7)		9(60.0)	6(40.0）		7(46.7)	8(53.3)		7(46.7)	8(53.3)
				>23.7	6(40.0)	9(60.0）		6(40.0)	9(60.0）		8(53.3)	7(46.7)		7(46.7)	8(53.3)		7(46.7)	8(53.3)		6(40.0)	9(60.0）		8(53.3)	7(46.7)		8(53.3)	7(46.7)
				Cancer FHx			0.682			0.682			1			0.682			1			1			0.682			1
				Yes	5(33.3)	3(20.0)		5(33.3)	3(20.0)		4(26.7)	4(26.7)		5(33.3)	3(20.0)		4(26.7)	4(26.7)		4(26.7)	4(26.7)		3(20.0)	5(33.3)		4(26.7)	4(26.7)
				No	10(66.7)	12(80.0)		10(66.7)	12(80.0)		11(73.3)	11(73.3)		10(66.7)	12(80.0)		11(73.3)	11(73.3)		11(73.3)	11(73.3)		12(80.0)	10(66.7)		11(73.3)	11(73.3)
				Polyps			0.45			0.45			1			1			0.45			1			0.45			1
				Yes	4(26.7)	7(46.7)		4(26.7)	7(46.7)		5(33.3)	6(40.0）		5(33.3)	6(40.0）		4(26.7)	7(46.7)		5(33.3)	6(40.0）		4(26.7)	7(46.7)		5(33.3)	6(40.0）
				No	11(73.3)	8(53.3)		11(73.3)	8(53.3)		10(66.7)	9(60.0）		10(66.7)	9(60.0）		11(73.3)	8(53.3)		10(66.7)	9(60.0）		11(73.3)	8(53.3)		10(66.7)	9(60.0）
				Tumor length			1			1			1			1			1			0.427			1			1
				<5cm	4(26.7)	5(33.3)		4(26.7)	5(33.3)		4(26.7)	5(33.3)		4(26.7)	5(33.3)		4(26.7)	5(33.3)		3(20.0)	6(40.0）		4(26.7)	5(33.3)		4(26.7)	5(33.3)
				≥5cm	11(73.3)	10(66.7)		11(73.3)	10(66.7)		11(73.3)	10(66.7)		11(73.3)	10(66.7)		11(73.3)	10(66.7)		12(80.0）	9(60.0）		11(73.3)	10(66.7)		11(73.3)	10(66.7)
				Tumor location			0.035			0.035			0.215			0.215			0.035			0.035			0.215			0.215
				≤5cm	14(93.3)	8(53.3)		14(93.3)	8(53.3)		13(86.7）	9(60.0)		13(86.7）	9(60.0)		14(93.3)	8(53.3)		14(93.3)	8(53.3)		13(86.7)	9(60.0)		13(86.7）	9(60.0)
				>5cm	1(6.7)	7(46.7)		1(6.7)	7(46.7)		2(13.3)	6(40.0)		2(13.3)	6(40.0)		1(6.7)	7(46.7)		1(6.7)	7(46.7)		2(13.3)	6(40.0)		2(13.3)	6(40.0)
				pT stage			0.264			0.264			0.264			1			0.264			0.71			1			0.264
				T0-2	4(26.7)	8(53.3)		4(26.7)	8(53.3)		4(26.7)	8(53.3)		6(40.0）	6(40.0）		4(26.7)	8(53.3)		5(33.3)	7(46.7)		6(40.0)	6(40.0)		4(26.7)	8(53.3)
				T3-4	11(73.3)	7(46.7)		11(73.3)	7(46.7)		11(73.3)	7(46.7)		9(60.0）	9(60.0）		11(73.3)	7(46.7)		10(66.7)	8(53.3)		9(60.0）	9(60.0)		11(73.3)	7(46.7)
				pN stage			0.245			0.245			0.245			0.7			0.245			0.7			1			0.245
				N0	8(53.3)	12(80.0)		8(53.3)	12(80.0)		8(53.3)	12(80.0)		9(60.0)	11(73.3)		8(53.3)	12(80.0)		9(60.0)	11(73.3)		10(66.7)	10(66.7)		8(53.3)	12(80.0)
				N1-3	7(46.7)	3(20.0)		7(46.7)	3(20.0)		7(46.7)	3(20.0)		6(40.0)	4(26.7)		7(46.7)	3(20.0)		6(40.0)	4(26.7)		5(33.3)	5(33.3)		7(46.7)	3(20.0)
				Lymphovascular invasion			1			1			1			1			1			1			0.33			1
				Yes	3(20.0)	2(13.3)		3(20.0)	2(13.3)		3(20.0)	2(13.3)		3(20.0)	2(13.3)		3(20.0)	2(13.3)		3(20.0)	2(13.3)		1(6.7)	4(26.7)		3(20.0)	2(13.3)
				No	12(80.0）	13(86.7）		12(80.0）	13(86.7）		12(80.0）	13(86.7）		12(80.0）	13(86.7）		12(80.0）	13(86.7）		12(80.0）	13(86.7）		14(93.3)	11(73.3)		12(80.0）	13(86.7）
				Perineural invasion			1			1			1			1			1			1			0.33			1
				Yes	3(20.0)	2(13.3)		3(20.0)	2(13.3)		2(13.3)	3(20.0)		2(13.3)	3(20.0)		3(20.0)	2(13.3)		3(20.0)	2(13.3)		1(6.7)	4(26.7)		2(13.3)	3(20.0)
				No	12(80.0）	13(86.7）		12(80.0）	13(86.7）		13(86.7）	12(80.0）		13(86.7）	12(80.0）		12(80.0）	13(86.7）		12(80.0）	13(86.7）		14(93.3)	11(73.3)		13(86.7）	12(80.0）
				Abbreviations: BMI= Body Mass Index; Cancer FHx = family history of cancer;The data represent the numbers of patients, with percentages in parentheses;Boldness indicates p-value less than 0.05
